# Supplementary material
Source: publisher figshare collection journal article supplement (https://frontiersin.figshare.com/ndownloader/files/12469370)
Supplement: Supplementary file [file 12469370]

**TABLE S3** Comparison of the length of the germ tube ( $\mu\text{m}$ ) of the wild-type PO212 (wtPO212) and the transformed PO212 strains (PO212\_ar1, PO212\_arRED3 and PO212\_in5) at different temperatures and pH values

| Strain               | Temperature ( $^{\circ}\text{C}$ ) |      | pH      |      |      |        |
|----------------------|------------------------------------|------|---------|------|------|--------|
|                      | 25                                 | 35   | 4       | 5.5  | 7    | 8      |
| wtPO212              | 26.6                               | 0.0  | 36.5 ab | 48.6 | 26.6 | 36.5 a |
| PO212_ar1            | 22.5                               | 0.0  | 30.0 b  | 38.7 | 22.5 | 35.0 a |
| PO212_arRED3         | 26.3                               | 4.3  | 33.3 ab | 35.0 | 26.3 | 29.9 b |
| PO212_in5            | 27.7                               | 7.4  | 39.4 a  | 33.8 | 27.7 | 22.4 c |
| MS <sub>within</sub> | 30.1                               | 22.1 | 12.1    | 40.7 | 30.1 | 4.3    |
|                      | NS                                 | NS   |         | NS   | NS   |        |

Data are displayed as the mean of three replications. Data were analyzed by analysis of variance using the general linear model procedure in Statgraphics XVI Centurion for Windows 7 (StatPoint, Inc. Herndon, VA, USA). The repeat for temperature confirmed the results so, only results from one repeat are shown. Each value for pH is the average of two assays, with three replications per assay. Means followed by the same letter in each column are not significantly different by Student Newman Keul's test ( $P \leq 0.05$ ). MS<sub>within</sub> — error mean square. NS—not significant.
